# Supplementary material for: Transcriptome-wide characterization of the endogenous miR-34A-p53 tumor suppressor network
Source: PubMed Central journal article supplement (PMC5226533; doi:10.18632/oncotarget.10417), 2016-07-06
Supplement: oncotarget-07-49611-s001.pdf [file oncotarget-07-49611-s001.pdf]

# Transcriptome-wide characterization of the endogenous miR-34A-p53 tumor suppressor network

## Supplementary Materials

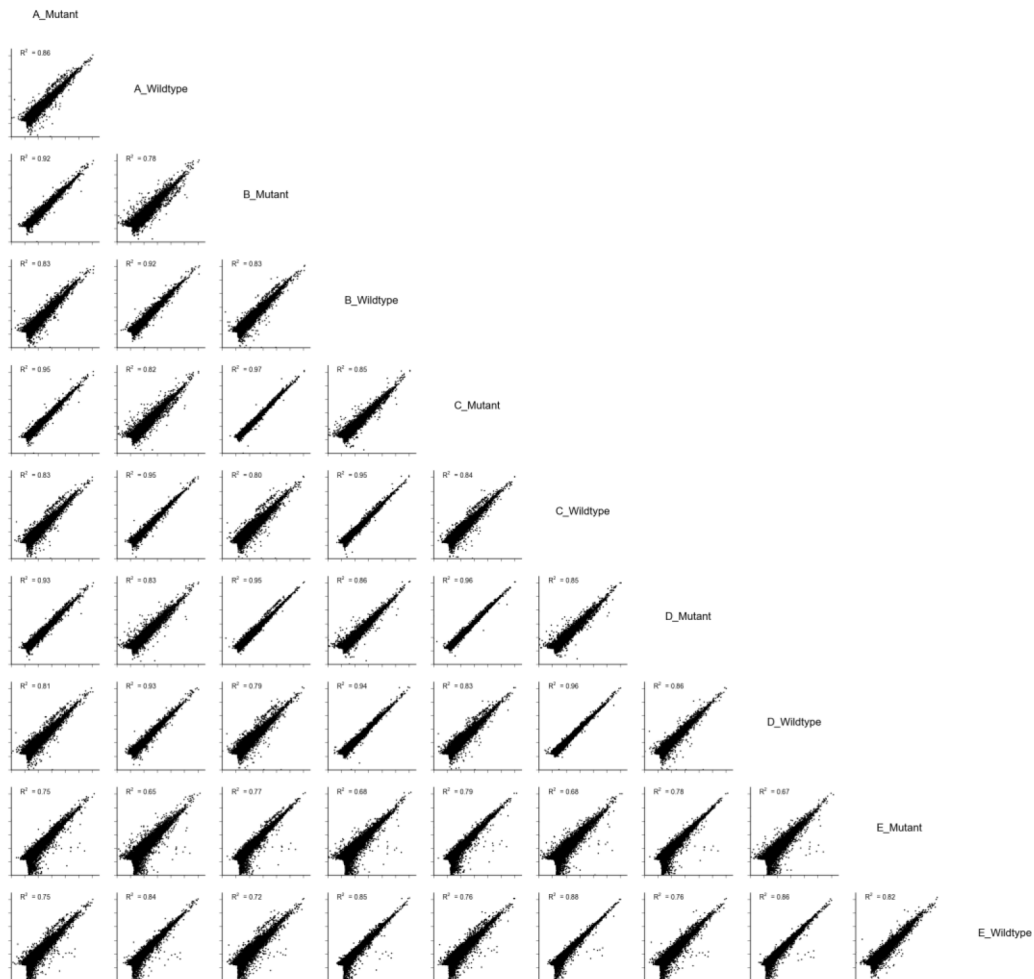

**Supplementary Figure S1: Pearson Correlation (PC) scatter plots.** Scatter plots depicting  $\log_2(\text{FPKM} + 1)$  values between sample pairs (transfection conditions) in the RNA-Seq dataset and the Pearson Correlation coefficient (A: untransfected; B: control mimic; C: control anti-miR; D: miR-34A mimic; E: anti-miR-34A). Values from each individual plot contributed to the Pearson correlation heatmap in Figure 1A of the manuscript.

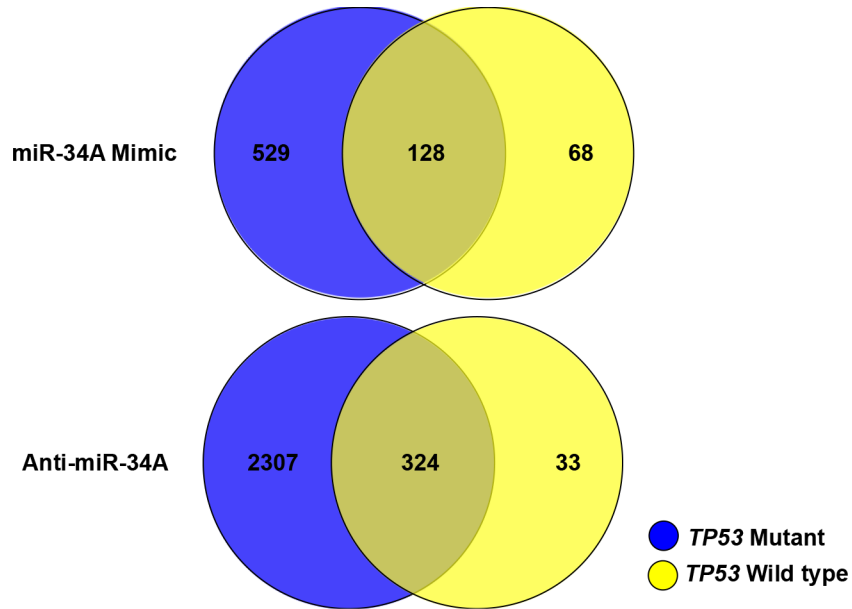

**Supplementary Figure S2: Unique and overlapping differentially expression transcripts in miR-34A over-expressing cells and miR-34A-deficient cells – *TP53* mutant and wild-type cell lines.** The Venn Diagrams depict the differentially expressed transcripts determined by the EdgeR algorithm in cells transfected with miR-34A mimic relative to control (top diagram) and cells transfected with anti-miR-34A relative to control (bottom diagram).

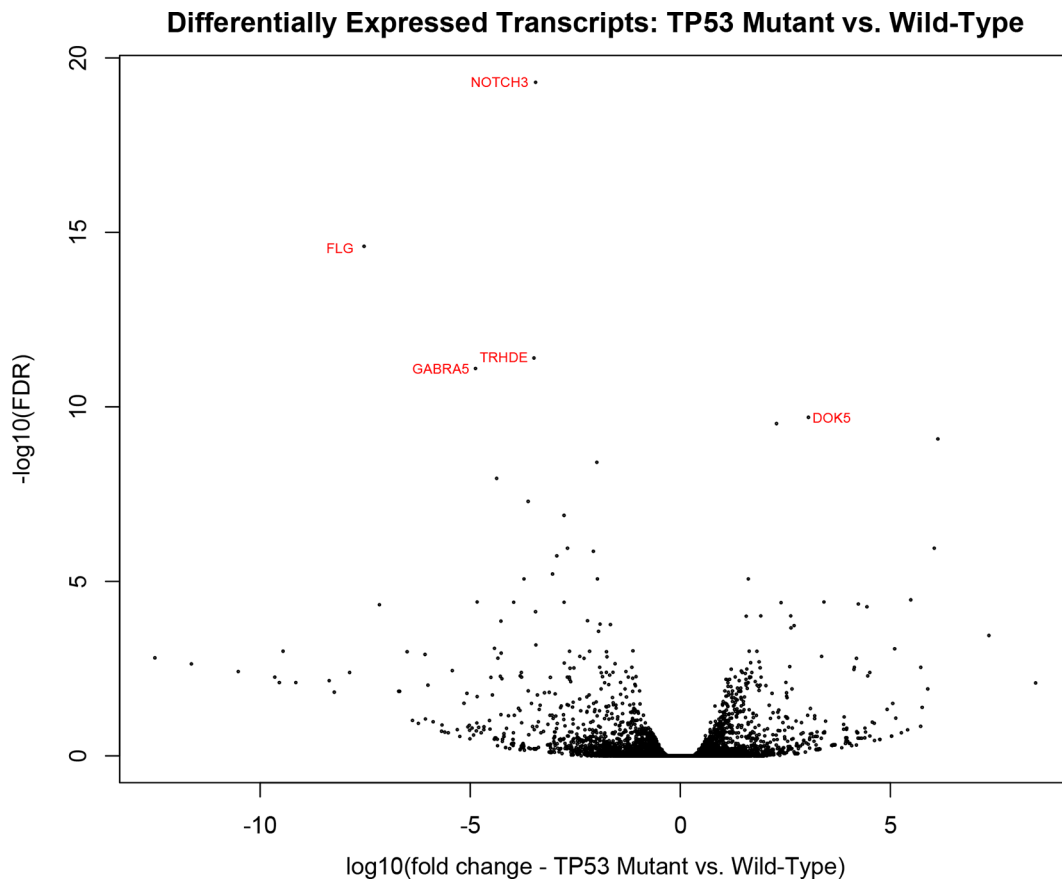

**Supplementary Figure S3: Volcano plot of differentially expressed RNA transcripts in *TP53* mutant fibroblast cell lines relative to wild-type lines.** The horizontal axis depicts the  $\log_{10}$  fold change transcript expression in *TP53* mutant fibroblast lines relative to wild-type. The vertical axis depicts the negative  $\log_{10}$  of the FDR value for each transcript. The genes encoded by the top differentially expressed transcript by lowest FDR value are labeled in red.

### Differentially Expressed Transcripts: miR-34A Mimic - LFS Cell Lines

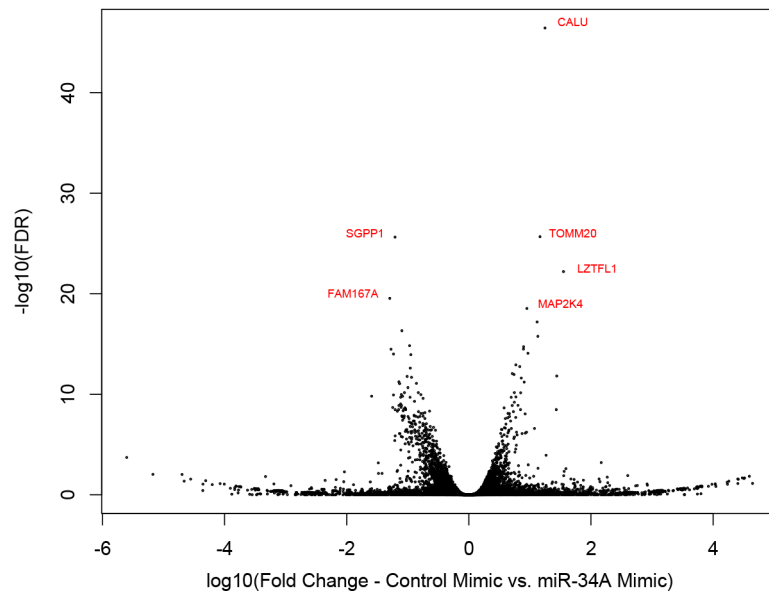

### Differentially Expressed Transcripts: miR-34A Mimic - TP53 Wild Type Cell Lines

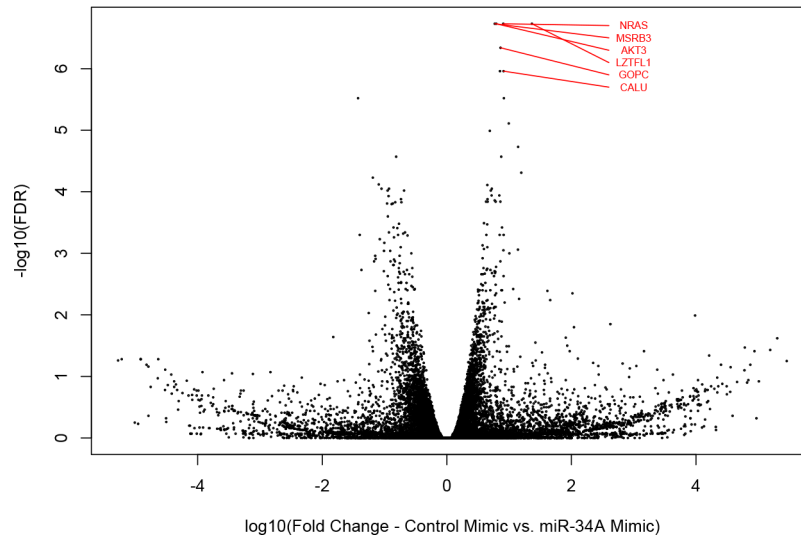

**Supplementary Figure S4: (A–B)** Volcano plots of differentially expressed transcripts in (A) *TP53* mutant and (B) wild-type fibroblast cell lines with elevated miR-34A expression. The horizontal axis depicts the log<sub>10</sub>-transformed fold-change of transcript expression in cells transfected with miR-34A mimic relative to control. The vertical axis depicts the  $-\log_{10}(\text{FDR})$  values for each transcript. The transcripts with the lowest FDR values are annotated in red.

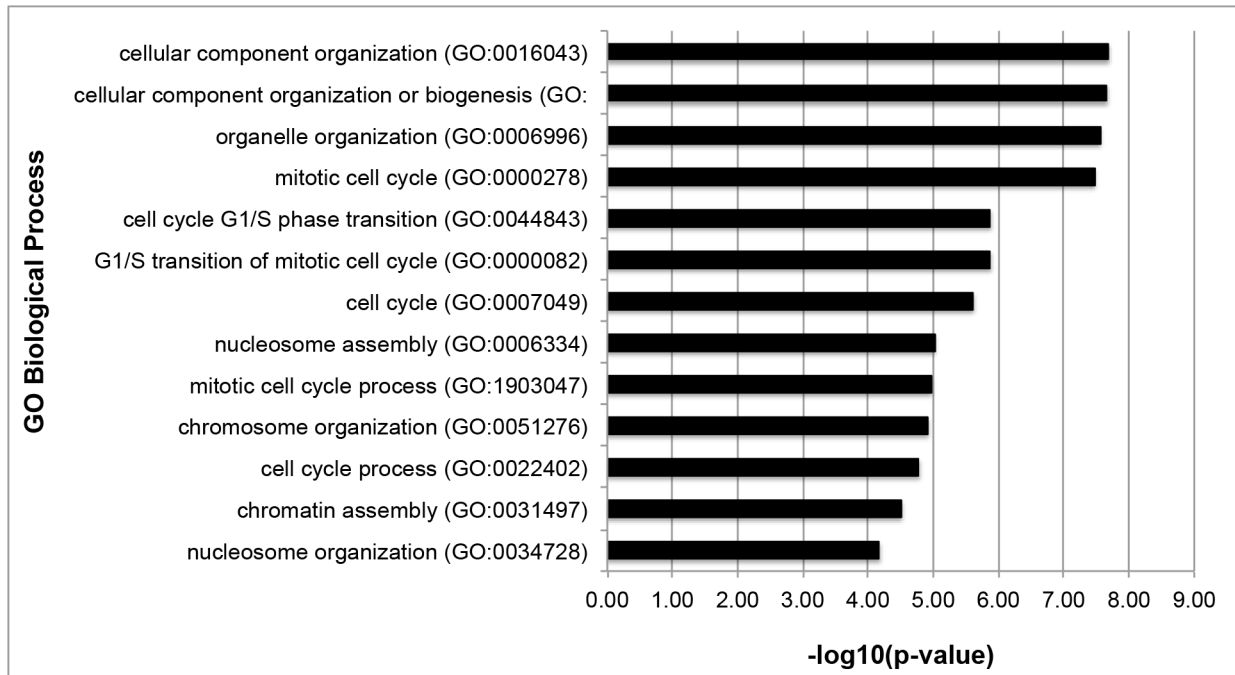

**Supplementary Figure S5: GO Biological Processes enriched in overlapping transcripts differentially expressed in *TP53* mutant and *TP53* wild-type fibroblast cell lines transfected with miR-34A mimic.** The  $-\log_{10}(p\text{-value})$  of enrichment is given on this horizontal axis and GO biological processes is annotated on the vertical axis.

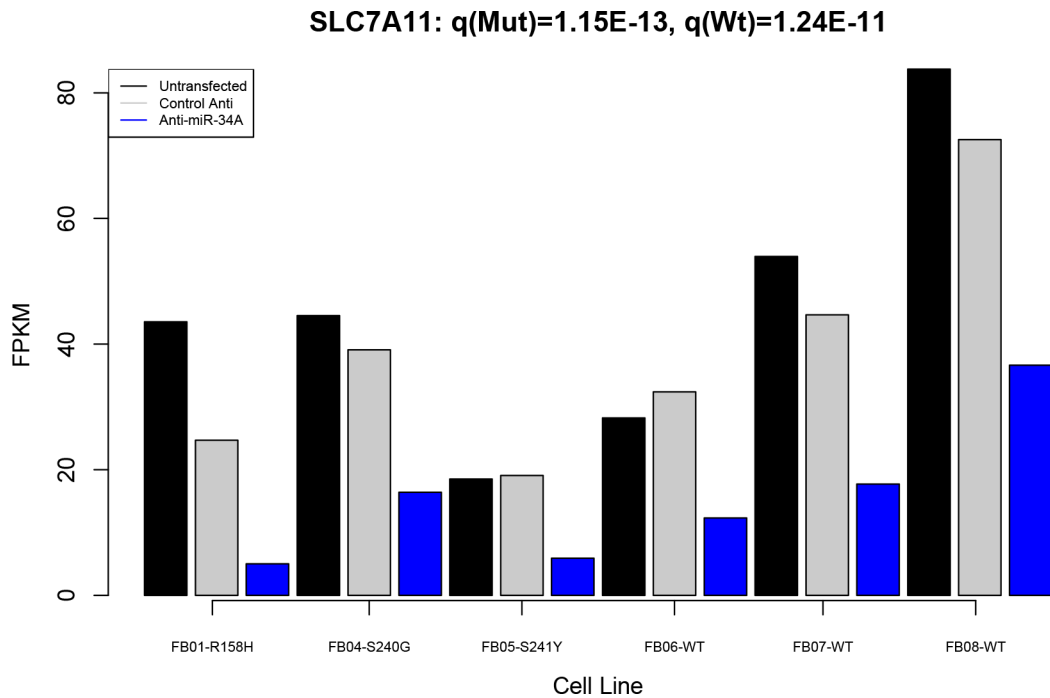

**Supplementary Figure S6: Transcript expression of components of *SLC7A11* in *TP53* mutant and wild-type cell lines transfected with anti-miR-34A.** In each plot, the respective cell line per three bars is provided on the horizontal axis, below the cell line transfected with control anti-miR (grey). Black bars indicate untransfected lines and blue indicate cell lines transfected with anti-miR-34A. The vertical axis depicts the FPKM expression value for *SLC7A11* across all cell lines at each transfection condition

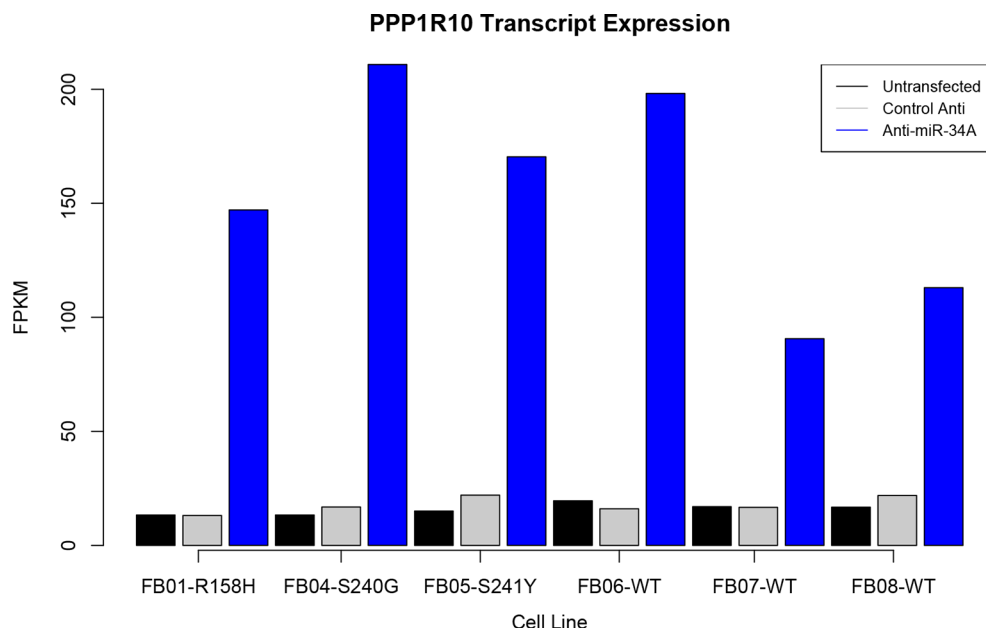

**Supplementary Figure S7: Transcript expression of components of PPP1R10 in *TP53* mutant and wild-type cell lines transfected with anti-miR-34A.** In each plot, the respective cell line per three bars is provided on the horizontal axis, below the cell line transfected with control anti-miR (grey). Black bars indicate untransfected lines and blue indicate cell lines transfected with anti-miR-34A. The vertical axis depicts the FPKM expression value for PPP1R10 across all cell lines at each transfection condition.

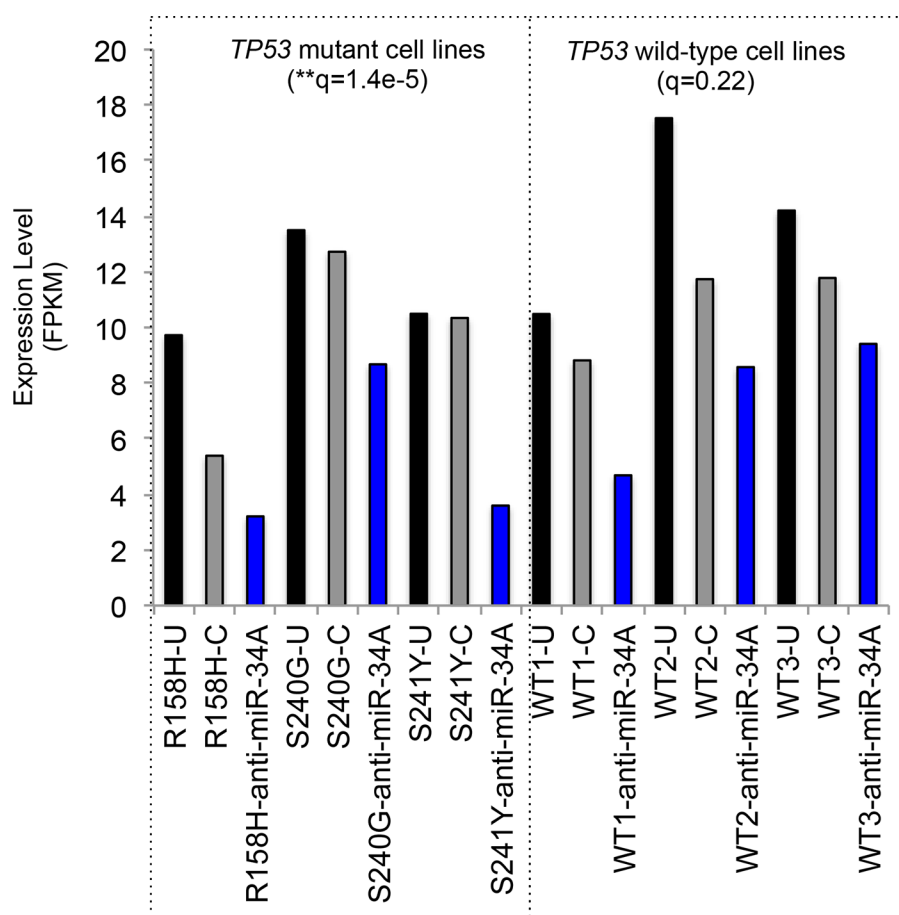

**Supplementary Figure S8: TP53 transcript levels in *TP53* mutant and wild-type cell lines following transfection with an anti-miR-34A.** Black bars indicate untransfected lines and blue indicate cell lines transfected with anti-miR-34A. The vertical axis depicts the FPKM expression value for *TP53* across all cell lines at each transfection condition. (U = untransfected, C = control anti-miR; ‘WT’ in the cell line IDs on the horizontal axis indicate ‘wild-type’).

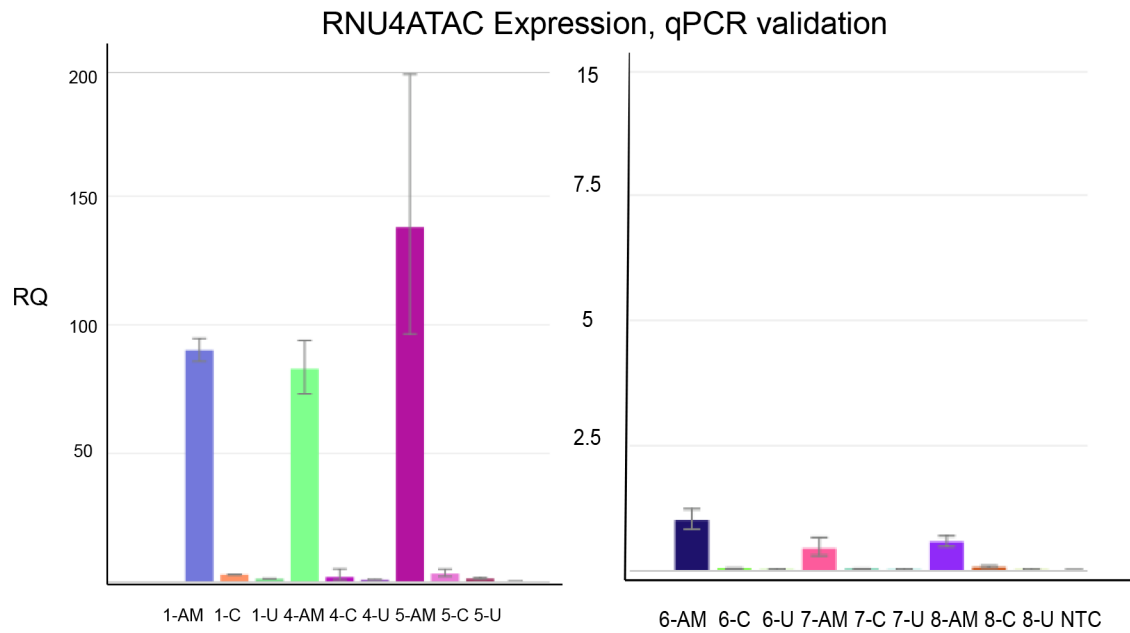

**Supplementary Figure S9: qPCR validation of RNU4ATAC expression in *TP53* mutant and *TP53* wild-type cell lines.** Expression levels were measured by qPCR; RQ = relative quantification; all transcripts were normalized to 18S Ct values. Error bars denote standard error of technical replicates ( $n = 3$ ).

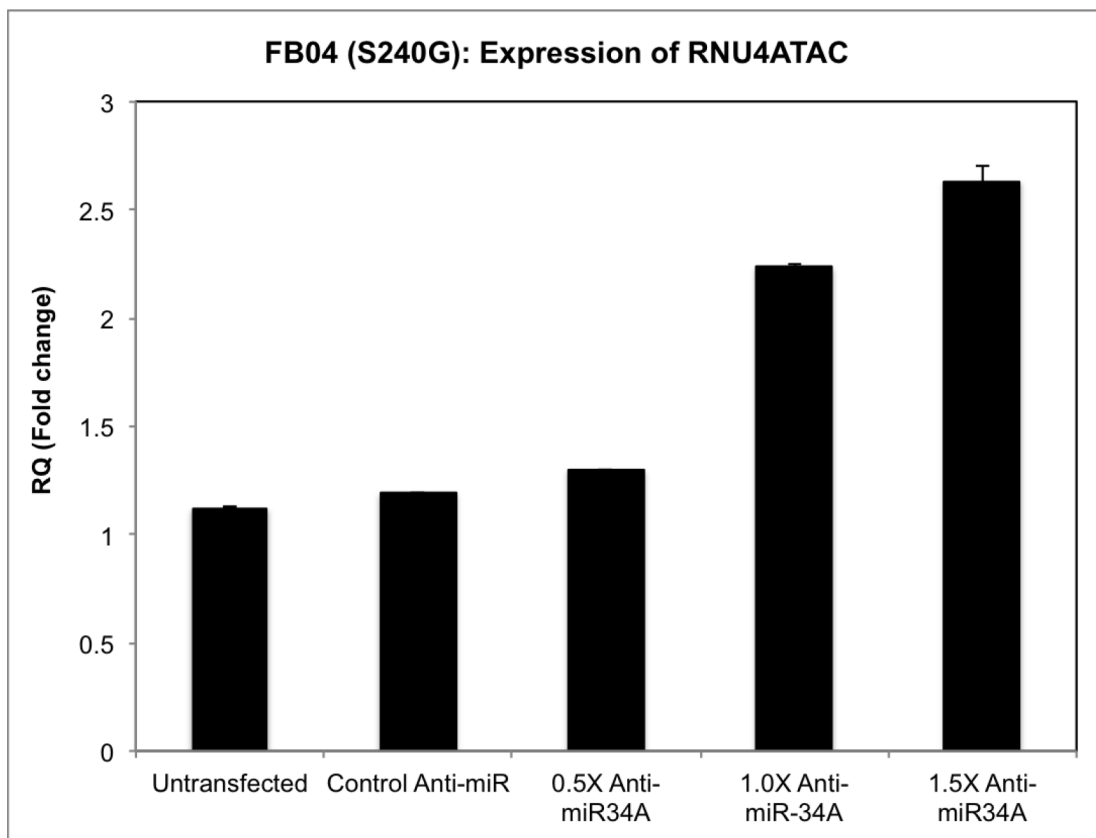

**Supplementary Figure S10: RNU4ATAC expression by qPCR in FB04 (S240G) cell line using increasing doses of anti-miR-34A oligonucleotide.** RQ = relative quantification; all transcripts were normalized to 18S Ct values. Error bars denote standard error of technical replicates ( $n = 3$ ).

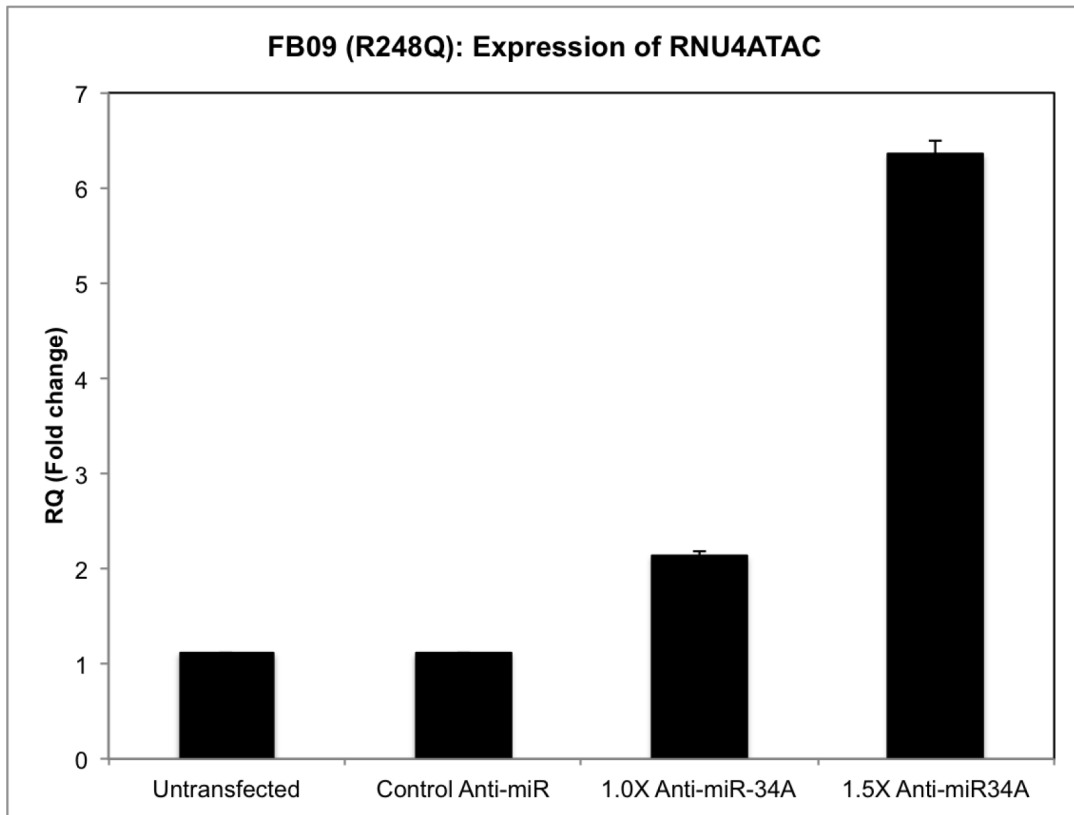

**Supplementary Figure S11: RNU4ATAC expression by qPCR in FB09 (R248Q) cell line using increasing doses of anti-miR-34A oligonucleotide.** RQ = relative quantification; all transcripts were normalized to 18S Ct values. Error bars denote standard error of technical replicates ( $n = 3$ ).

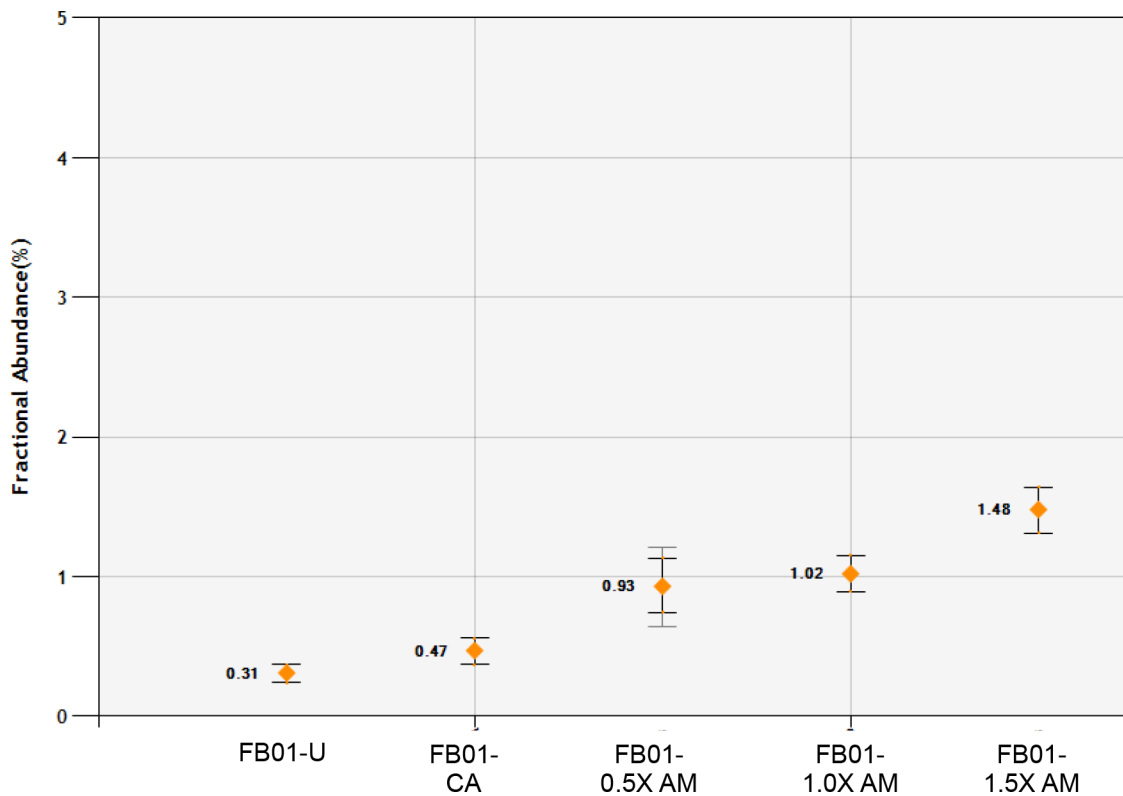

**Supplementary Figure S12: LINC-PINT expression in FB01 cell line (R158H) by digital droplet PCR (ddPCR) in FB01 (R158H) cell line.** Fractional transcript abundance per 1uL of input RNA is shown. Error bars denote standard deviation of technical replicates ( $n = 4$ ).

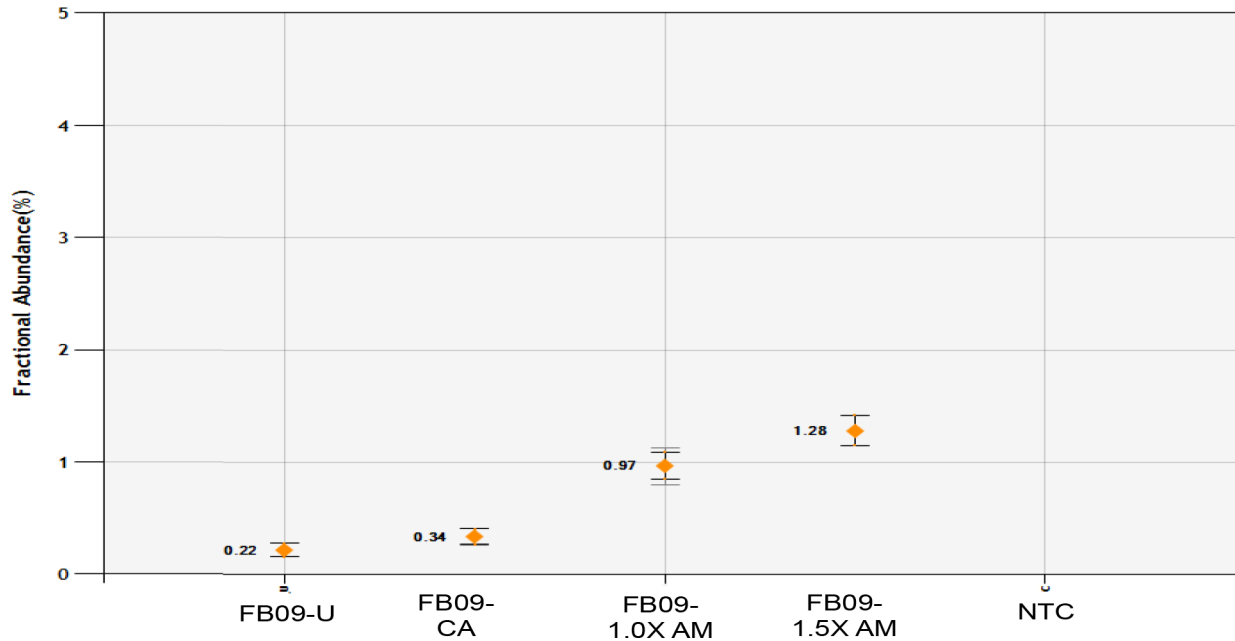

**Supplementary Figure S13: LINC-PINT expression in FB09 cell line (R248Q) by digital droplet PCR (ddPCR) in FB01 (R158H) cell line.** Fractional transcript abundance per 1uL of input RNA is shown. Error bars denote standard deviation of technical replicates ( $n = 4$ ).

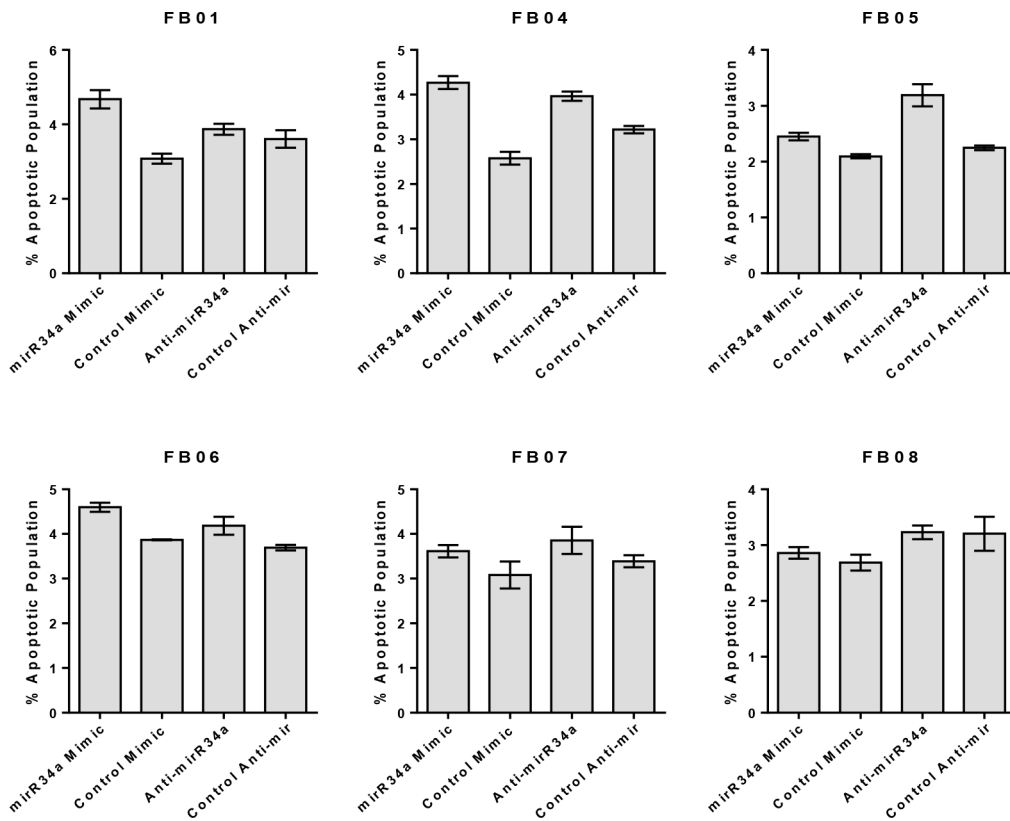

**Supplementary Figure S14: Bar graphs of apoptotic cell fraction in LFS and TP53 wild-type fibroblast cell lines transfected with miR-34A mimics or anti-miR-34A oligonucleotides.** Vertical axis depicts the fraction of cells that were apoptotic (double positive Annexin-V/7AAD stain). The transfection agent used is identified on the horizontal axis of each plot. FB01, FB04 and FB05 are primary fibroblast cell lines derived from LFS patients. FB07-08 are primary fibroblast cell lines derived with TP53 wild-type patients. Error bars denote standard deviation of technical replicates ( $n = 3$ ).



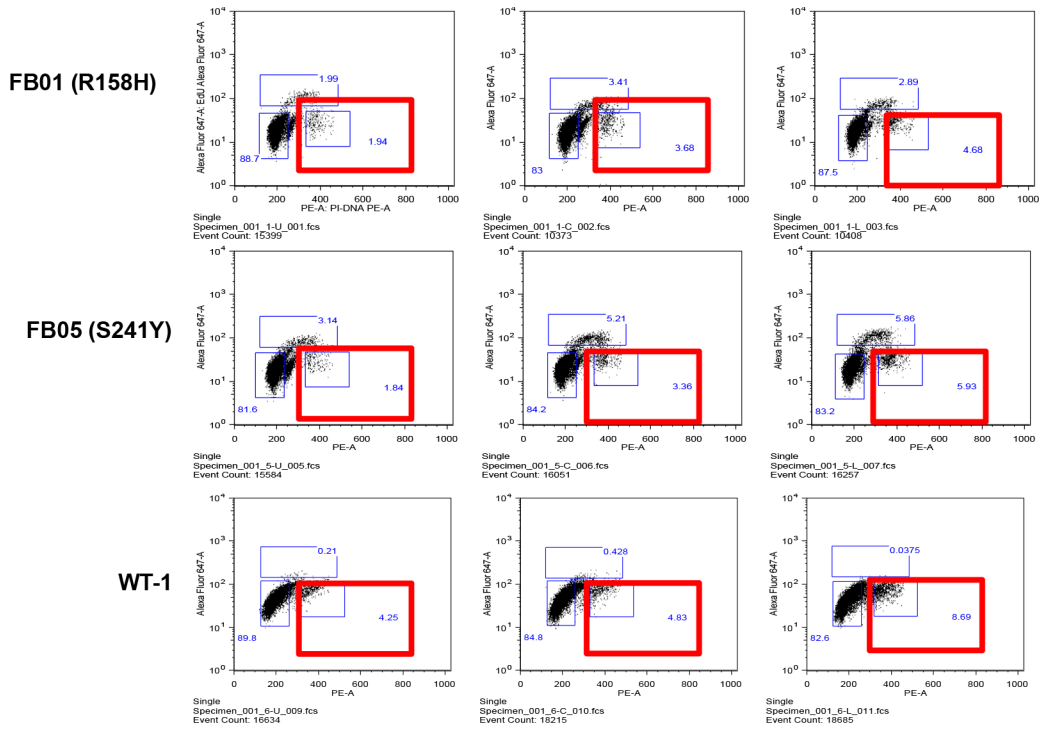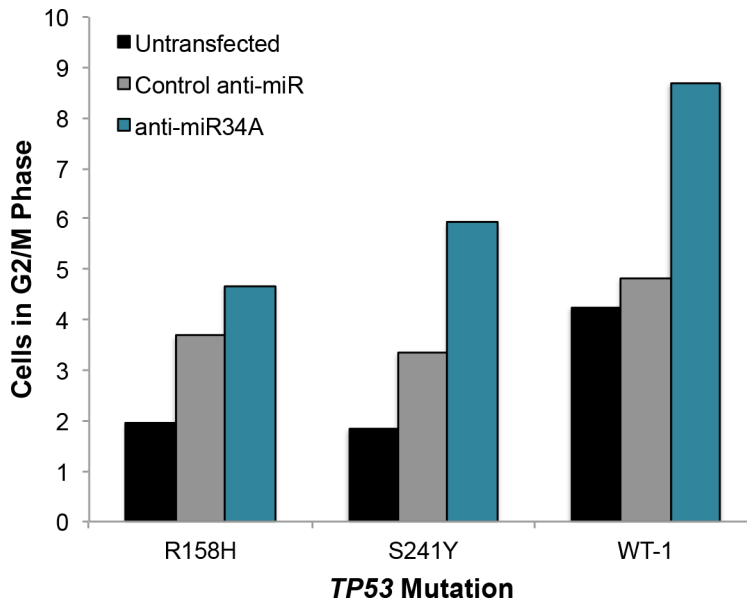

**Supplementary Figure S15: (A–B)** Experimental replicate of cell cycle analysis assays using three cell lines. Panel A shows the flow cytometry curves, with red boxes delineating proportion of cells in G2/M phase. Panel B depicts a bar graph of the fraction of cells in G2/M for each cell line and each experimental condition.

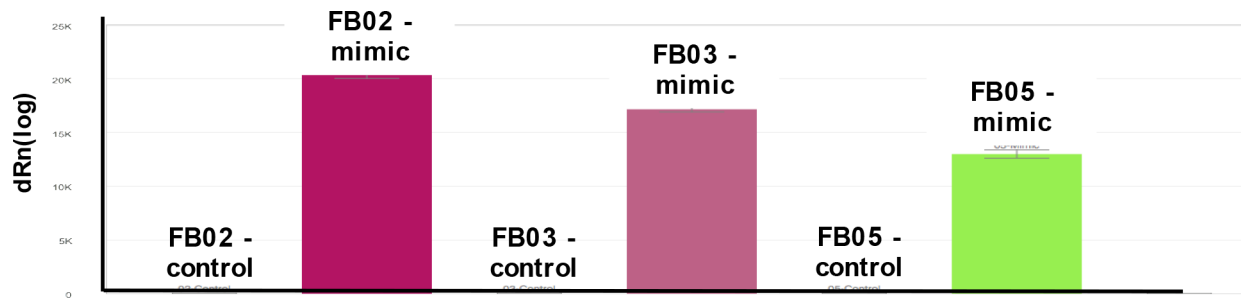

Supplementary Figure S16: qPCR validation of transfection efficiency in 3 cell lines.

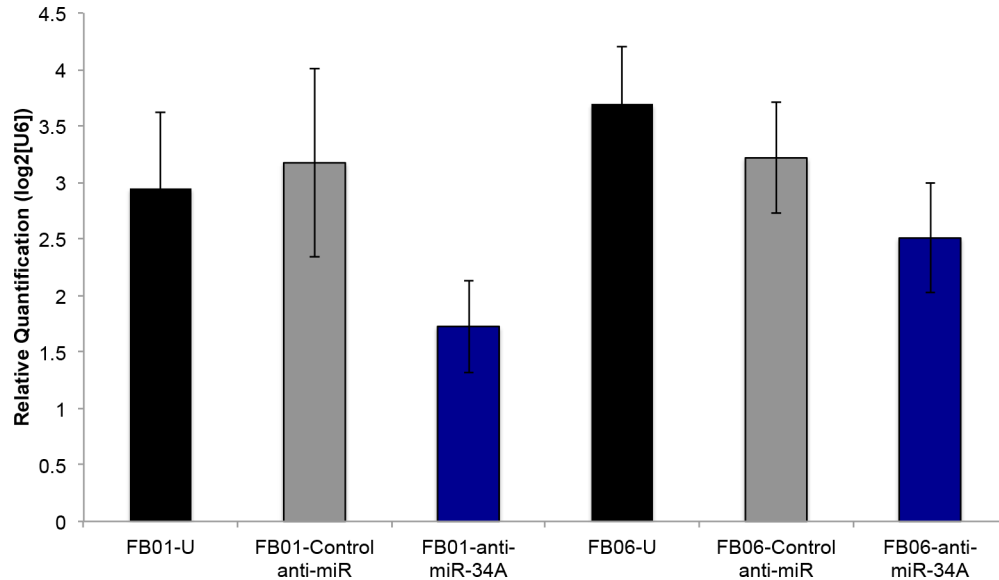

Supplementary Figure S17: qPCR validation of decreased miR-34A expression following transfection with an anti-miR-34A inhibitor (anti-miR). Expression levels of miR-34A are shown for each transfected condition in the FB01 cell line (R158H) and FB06 cell line (TP53 wild-type). Relative log<sub>2</sub> miR-34A transcript expression is shown on the vertical axis, relative to snoU6 endogenous control (U = untransfected). Error bars denote standard deviation of technical replicates ( $n = 6$ ). miR-34A levels are decreased relative to untransfected and control transfected cells for both cell lines (\*\* $p < 0.001$  for all comparisons; FB01: U vs anti-miR:  $p = 1.42e-5$ ; FB01 CA vs. anti-miR:  $p = 9.5e-6$ ; FB06: U vs anti-miR:  $p = 1.31e-7$ ; FB06: CA vs anti-miR:  $p = 1.46e-10$ ).

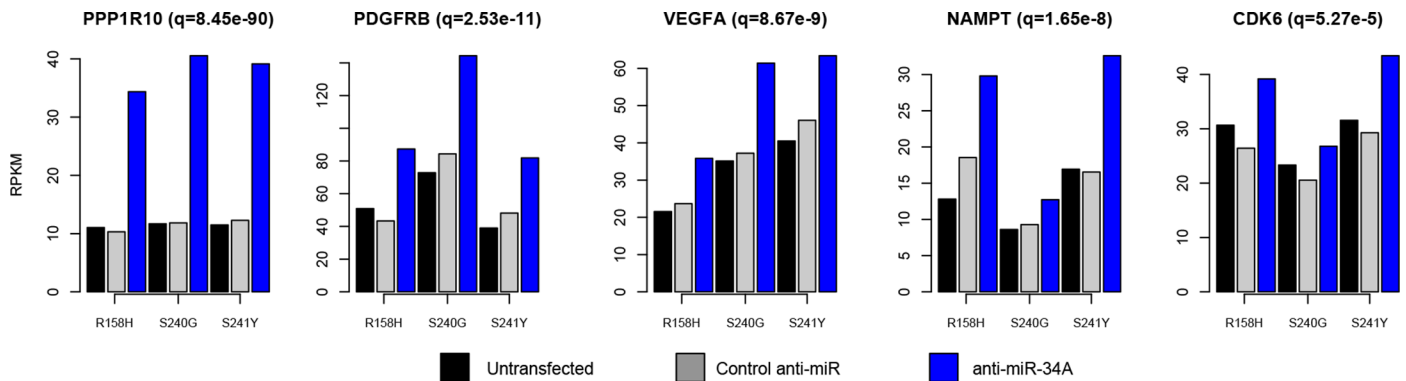

Supplementary Figure S18: Barplots depicting expression changes of known miR-34A target transcripts following transfection with hsa-miR-34A-5p inhibitor in 3 LFS cell lines (FB01, FB04, FB05). In each plot, the respective cell line per triplet bars (black, grey and blue bars) is provided on the horizontal axis, below the cell line transfected with control anti-miR (grey). Black bars indicate untransfected lines and blue indicate cell lines transfected with hsa-miR-34A-5p inhibitor. The vertical axis depicts the FPKM expression value for each transcript across all cell lines at each transfection condition.

**Supplementary Table S1: Non-exhaustive list of cancers in which miR-34A deregulation is implicated**

| <b>Malignancy</b>                          | <b>Reference</b>                    |
|--------------------------------------------|-------------------------------------|
| Acute myeloid leukemia                     | Rucker F. G. et al., 2013           |
| Bladder carcinoma                          | Vinall R. L. et al., 2012           |
| Brain cancer                               | Guessous F. et al., 2011            |
| Brain glioma                               | Silber J. et al., 2012              |
| Breast cancer                              | Kastl L. et al., 2012               |
| Carcinoma                                  | Pang R. T. et al., 2010             |
| Cervical cancer                            | Wang X. et al., 2009                |
| Choriocarcinoma                            | Pang R. T. et al., 2010             |
| Chronic lymphocytic leukemia               | Dijkstra M. K. et al., 2008         |
| Colorectal cancer                          | Nugent M. et al., 2012              |
| Esophageal cancer                          | Chen X. et al., 2012                |
| Glioblastoma                               | Genovese G. et al., 2012            |
| Head and neck cancer                       | Kumar B. et al., 2012               |
| Hepatocellular carcinoma                   | Pineau P. et al., 2010              |
| Laryngeal carcinoma                        | Shen Z. et al., 2012                |
| Leukemia                                   | Zauli G. et al., 2011               |
| Lung cancer                                | Duan W. et al., 2010                |
| Lung small cell carcinoma                  | Lee J. H. et al., 2011              |
| Lymphoblastic leukemia                     | Mraz M. et al., 2009                |
| Lymphoma                                   | Craig V. J. et al., 2011            |
| Medulloblastoma                            | De Antonellis P. et al., 2011       |
| Melanoma                                   | Heinemann A. et al., 2012           |
| Myelodysplastic syndromes                  | Dostalova Merkerova M. et al., 2011 |
| Neuroblastoma                              | Chakrabarti M. et al., 2012         |
| Non-small cell lung carcinoma              | Ji X. et al., 2012                  |
| Osteosarcoma                               | Yan K. et al., 2012                 |
| Ovarian cancer                             | Vogt M. et al., 2011                |
| Ovarian papillary neoplasm                 | Taylor D. D. et al., 2008           |
| Pancreatic cancer                          | Jamieson N. B. et al., 2012         |
| Peripheral primitive neuroectodermal tumor | Nakatani F. et al., 2012            |
| Prostate cancer                            | Kong D. et al., 2012                |
| Renal cell carcinoma                       | Yamamura S. et al., 2012            |
| Retinoblastoma                             | Jo D. H. et al., 2011               |
| Sarcoma                                    | Vogt M. et al., 2011                |
| Squamous cell carcinoma                    | Chen X. et al., 2012                |
| Squamous cell neoplasm                     | Scapoli L. et al., 2011             |
| Stomach cancer                             | Ji Q. et al., 2008                  |

**Supplementary Table S2: Cells from which RNA was harvested for RNA-Sequencing**

| Cell Line | Transfection Condition | RNA-Seq ID |
|-----------|------------------------|------------|
| FB01      | Untransfected          | 1A         |
|           | Control Mimic          | 1B         |
|           | Control Anti-miR       | 1C         |
|           | miR-34A Mimic          | 1D         |
|           | Anti-miR-34A           | 1E         |
| FB04      | Untransfected          | 4A         |
|           | Control Mimic          | 4B         |
|           | Control Anti-miR       | 4C         |
|           | miR-34A Mimic          | 4D         |
|           | Anti-miR-34A           | 4E         |
| FB05      | Untransfected          | 5A         |
|           | Control Mimic          | 5B         |
|           | Control Anti-miR       | 5C         |
|           | miR-34A Mimic          | 5D         |
|           | Anti-miR-34A           | 5E         |
| FB06      | Untransfected          | 6A         |
|           | Control Mimic          | 6B         |
|           | Control Anti-miR       | 6C         |
|           | miR-34A Mimic          | 6D         |
|           | Anti-miR-34A           | 6E         |
| FB07      | Untransfected          | 7A         |
|           | Control Mimic          | 7B         |
|           | Control Anti-miR       | 7C         |
|           | miR-34A Mimic          | 7D         |
|           | Anti-miR-34A           | 7E         |
| FB08      | Untransfected          | A8         |
|           | Control Mimic          | B8         |
|           | Control Anti-miR       | C8         |
|           | miR-34A Mimic          | D8         |
|           | Anti-miR-34A           | E8         |

**Supplementary Table S3: Number of differentially expressed RNA-genes and protein-coding transcripts by condition determined by EdgeR**

| TP53 Status | Condition              | No. lranscripts |
|-------------|------------------------|-----------------|
|             | U_MT Vs. WT            | 136             |
| Mutant      | m_cm                   | 657             |
| Mutant      | am_cam                 | 2631            |
| Mutant      | Common-m & m           | 155             |
| Mutant      | m_cm_unique            | 502             |
| Mutant      | am_cam_unique          | 2576            |
| Wild-Type   | m_cm                   | 196             |
| Wild-Type   | am_cam                 | 357             |
| Wild-Type   | Common-m & m           | 3               |
| Wild-Type   | m_cm_unique            | 193             |
| Wild-Type   | am_cam_unique          | 354             |
|             | Common-MT and WT Mimic | 128             |
| Mutant      | Mimic_Unique           | 589             |
| Wild-Type   | Mimic_Unique           | 68              |
|             | Common-MT and WT Anti  | 324             |
| Mutant      | Anti_Unique            | 2307            |
| Wild-Type   | Anti_Unique            | 33              |

(U = untransfected; MT = Mutant; WT = wild-type; m = mimic; cm = control mimic; am: anti-miR; cam = control anti-miR).

**Supplementary Table S4: Number of differentially expressed RNA-genes and protein-coding transcripts by condition determined by Cufflinks**

| Cufflinks Summary FDR < 0.05 |                        |     |
|------------------------------|------------------------|-----|
|                              | U_MT vs. WT            |     |
|                              | U_MT vs. WT            | 421 |
| Mutant                       | m_cm                   | 101 |
| Mutant                       | am_cam                 | 592 |
| Mutant                       | Common-m & am          | 26  |
| Mutant                       | m_cm_unique            | 75  |
| Mutant                       | am_cam_unique          | 566 |
| Wild-Type                    | m_cm                   | 0   |
| Wild-Type                    | am_cam                 | 71  |
| Wild-Type                    | Common-m & am          | 0   |
| Wild-Type                    | m_cm_unique            | -   |
| Wild-Type                    | am_cam_unique          | 71  |
|                              | Common-MT and WT Mimic | -   |
| Mutant                       | Mimic_Unique           | 101 |
| Wild-Type                    | Mimic_Unique           | -   |
|                              | Common-MTO and WT Anti | 50  |
| Mutant                       | Anti_Unique            | 542 |
| Wild-Type                    | Anti_Unique            | 21  |

(U = untransfected; MT = Mutant; WT = wild-type; m = mimic; cm = control mimic; am: anti-miR; cam = control anti-miR).

**Supplementary Table S5: Histone H1 isoforms differentially expressed in *TP53* mutation fibroblast cell lines, relative to wild-type lines, at an FDR < 0.01**

| Gene      | p-value  | FDR        | FB01-R158H | FB04-S240G | FB05-S241Y | FB06-WT    | FB07-WT    | FB08-WT    |
|-----------|----------|------------|------------|------------|------------|------------|------------|------------|
| HIST1H1D  | 5.02E-05 | 0.00950858 | 76.7611583 | 47.0321032 | 58.6672818 | 69.640158  | 140.148255 | 37.9547678 |
| HIST1H2AB | 2.18E-05 | 0.0055459  | 84.5379309 | 75.4419374 | 83.2782844 | 28.6516101 | 48.7791892 | 10.9964423 |
| HIST1H2AH | 9.50E-06 | 0.00325831 | 264.156139 | 250.16283  | 321.104153 | 71.2595852 | 143.620196 | 49.0212283 |
| HIST1H2AI | 3.86E-05 | 0.00796446 | 220.548185 | 160.219299 | 212.992747 | 40.8198589 | 123.463965 | 30.8994436 |
| HIST1H2AK | 1.79E-06 | 0.00100528 | 86.2352537 | 55.0200687 | 80.7199983 | 28.1602958 | 38.1717903 | 13.8830461 |
| HIST1H2AL | 1.53E-05 | 0.004371   | 348.949511 | 246.377914 | 290.313314 | 77.1462466 | 203.901705 | 64.4194565 |
| HIST1H2BF | 2.86E-05 | 0.00641785 | 251.232645 | 202.284732 | 166.935645 | 36.1091533 | 65.6099053 | 49.4565156 |
| HIST1H2BG | 1.39E-05 | 0.00409764 | 380.211746 | 307.177467 | 357.975645 | 92.6754949 | 209.656059 | 40.3673732 |
| HIST1H2BH | 1.14E-05 | 0.00371916 | 205.267655 | 263.581632 | 330.880259 | 91.3491704 | 193.836439 | 72.0754665 |
| HIST1H2BM | 5.24E-06 | 0.0021451  | 228.969314 | 210.398105 | 228.832724 | 43.6639995 | 65.2382665 | 34.8769207 |
| HIST1H3A  | 2.07E-05 | 0.00546266 | 128.011216 | 60.1023754 | 161.968779 | 29.1190724 | 78.9271345 | 23.0065594 |
| HIST1H3C  | 4.23E-05 | 0.00838627 | 548.35872  | 401.440679 | 529.657537 | 118.169712 | 283.628917 | 79.343345  |
| HIST1H3E  | 1.25E-07 | 9.94E-05   | 145.836625 | 105.355401 | 150.677104 | 19.2656208 | 65.6983832 | 30.7110025 |
| HIST1H3F  | 1.41E-05 | 0.00409764 | 421.57233  | 313.412489 | 387.870827 | 79.64552   | 107.069354 | 57.8390171 |
| HIST1H3H  | 1.95E-06 | 0.0010115  | 142.070745 | 209.935536 | 280.580726 | 54.0337868 | 129.265546 | 34.9011072 |
| HIST1H3J  | 2.46E-05 | 0.00583851 | 160.289343 | 136.32322  | 92.6015296 | 35.2165179 | 91.3649666 | 24.064575  |
| HIST1H4A  | 1.19E-07 | 9.77E-05   | 88.4011295 | 73.8194207 | 87.2571116 | 21.2986928 | 32.6094165 | 10.5023064 |
| HIST1H4B  | 3.17E-05 | 0.00699157 | 196.564379 | 149.945654 | 244.35628  | 88.9449443 | 112.052231 | 37.9009927 |
| HIST1H4L  | 2.10E-05 | 0.00549228 | 206.266965 | 219.451012 | 152.392934 | 57.5185038 | 123.659304 | 59.4262095 |

FPKM (Fragments Per Kilobase of transcript per Million mapped reads) values are listed for each cell cell for the respective gene.

**Supplementary Table S6: Transcripts that are highly differentially expressed in both *TP53* mutant and *TP53* wild-type cells transfected with miR-34A mimic**

|          |           |           |         |          |          |         |
|----------|-----------|-----------|---------|----------|----------|---------|
| AKT3     | CTDSP1    | HIST1H2AJ | LZTFL1  | PGM2L1   | SLC27A4  | UHRF1   |
| ANGPT1   | DDX18     | HIST1H2AL | MAP2K1  | PHF19    | SLC29A1  | VAMP4   |
| ARL1     | DRAM2     | HIST1H2BJ | MAP2K4  | PKMYT1   | SLC2A3   | WSB1    |
| ARRDC4   | E2F1      | HIST1H2BK | MCFD2   | PLAG1    | SMAP1    | WWTR1   |
| ASF1B    | E2F8      | HIST1H2BL | MCM2    | POLE     | SSFA2    | ZBTB18  |
| ATP11B   | ERLIN1    | HIST1H2BM | MCM3    | PTPMT1   | STAG2    | ZBTB47  |
| AXL      | ESPL1     | HIST1H3B  | MCM5    | PTPN13   | STX12    | ZDHHC18 |
| BOD1     | ESYT2     | HIST1H3C  | MCM7    | PVRL1    | TAPT1    | ZHX1    |
| BRWD3    | FAM167A   | HIST1H3D  | MED21   | RBPJ     | TBC1D13  |         |
| C1D      | FANCA     | HIST1H3F  | MET     | RFK      | TBL1XR1  |         |
| C21orf58 | FOSL1     | HIST1H3G  | MSRB3   | RNF6     | TCF19    |         |
| C6orf120 | G3BP2     | HIST1H3H  | MYBL2   | RRAS     | TMEM173  |         |
| C7orf49  | GABPA     | HIST1H4D  | NGRN    | RRM2     | TMEM184B |         |
| CALU     | GMNN      | HIST1H4E  | NKIRAS1 | RSL24D1  | TMEM241  |         |
| CDC25A   | GOPC      | HIST1H4L  | NRAS    | SAMD8    | TMEM65   |         |
| CDK4     | GSG2      | HIST2H2BF | NRBF2   | SBNO1    | TMEM67   |         |
| CDT1     | HDAC1     | KIF18B    | NUMBL   | SEL1L    | TOMM20   |         |
| CENPO    | HIST1H1B  | KIFC1     | NUP62   | SEMA3C   | TONSL    |         |
| CFL2     | HIST1H1E  | LETM1     | ORC1    | SH3GL1   | TP53INP1 |         |
| CNOT7    | HIST1H2AI | LYSMD3    | PDCD6   | SLC25A22 | TTC30A   |         |

**Supplementary Table S7: Suppressed transcripts containing the miR-34A complimentary seed sequence in *TP53* mutant cell lines treated with hsa-miR-34A-5p mimic**

| gene      | ACTGCC? | logFC      | FDR        |
|-----------|---------|------------|------------|
| KIF26A    | YES     | -5.6031008 | 0.00019818 |
| THBD      | YES     | -1.5929771 | 1.55E-10   |
| HPDL      | YES     | -1.4841305 | 0.00068574 |
| FAM167A   | YES     | -1.2952531 | 2.92E-20   |
| GMNN      | YES     | -1.2744642 | 3.42E-15   |
| TMED8     | YES     | -1.2460065 | 2.12E-09   |
| HIST1H3J  | YES     | -1.2347617 | 1.18E-10   |
| HIST1H4A  | YES     | -1.2338562 | 1.02E-14   |
| HIST1H1A  | YES     | -1.2131304 | 4.07E-06   |
| SGPP1     | YES     | -1.2078861 | 2.42E-26   |
| CCNE2     | YES     | -1.2075501 | 1.37E-06   |
| HIST1H4I  | NO      | -1.2075498 | 3.40E-09   |
| HIST1H2BL | NO      | -1.1705875 | 4.97E-09   |
| HIST1H2BE | YES     | -1.1497083 | 3.42E-09   |
| CDC25A    | YES     | -1.1465331 | 1.32E-09   |
| HIST1H3H  | NO      | -1.1456572 | 5.97E-12   |
| HIST2H3D  | YES     | -1.135703  | 8.10E-07   |
| HIST1H2AB | NO      | -1.134229  | 8.76E-12   |
| FAM111B   | NO      | -1.1299169 | 8.45E-07   |
| HIST1H3F  | NO      | -1.1183726 | 8.88E-10   |

**Supplementary Table S8: Suppressed transcripts containing the miR-34A complimentary seed sequence in *TP53* wild-type cell lines treated with hsa-miR-34A-5p mimic**

| gene      | ACTGCC | logFC      | FDR        |
|-----------|--------|------------|------------|
| SLC29A1   | YES    | -1.1884835 | 5.87E-05   |
| HIST1H2BL | NO     | -1.0930792 | 7.39E-05   |
| TONSL     | YES    | -1.0092249 | 0.00090603 |
| ASF1B     | NO     | -1.0036141 | 0.0006666  |
| CDIP1     | YES    | -0.9596118 | 0.00015588 |
| C21orf58  | NO     | -0.9464261 | 0.00025188 |
| HIST1H3F  | NO     | -0.9358122 | 0.00011235 |
| HIST1H3B  | NO     | -0.9294908 | 0.00045    |
| FAM167A   | YES    | -0.9287398 | 8.79E-05   |
| HIST2H2BF | NO     | -0.8874128 | 0.00015778 |
| SLC25A22  | YES    | -0.8567657 | 0.00038556 |
| E2F1      | NO     | -0.8487724 | 0.0005459  |
| HIST1H2AI | NO     | -0.82817   | 0.00014944 |
| MCM3      | NO     | -0.813352  | 2.83E-05   |
| HIST1H1B  | NO     | -0.768363  | 0.00034949 |
| AXL       | YES    | -0.7366334 | 0.00011235 |
| CDK4      | NO     | -0.6867536 | 9.37E-05   |

**Supplementary Table S9: Characterized or predicted lincRNAs regulated by miR-34A in *TP53* mutant cell lines**

| gene         | EGID      | am_cam_LR   | am_cam_PValue | am_cam_FD |
|--------------|-----------|-------------|---------------|-----------|
| LINC-PINT    | 378805    | 574.5745021 | 5.68E-127     | 2.88E-123 |
| LOC644656    | 644656    | 474.0475606 | 4.22E-105     | 1.78E-101 |
| LINC00936    | 338758    | 371.0286995 | 1.12E-82      | 2.83E-79  |
| MIR100HG     | 399959    | 370.6336456 | 1.36E-82      | 3.14E-79  |
| NS3BP        | 171391    | 332.1279395 | 3.31E-74      | 5.99E-71  |
| MIAT         | 440823    | 330.0461248 | 9.39E-74      | 1.59E-70  |
| LOC284454    | 284454    | 268.1491525 | 2.87E-60      | 3.84E-57  |
| LOC400684    | 400684    | 263.7290353 | 2.64E-59      | 3.35E-56  |
| LOC100272217 | 100272217 | 261.2440532 | 9.19E-59      | 1.11E-55  |
| FRMD6-AS1    | 145438    | 260.5888713 | 1.28E-58      | 1.47E-55  |
| LINC01126    | 100129726 | 253.3655456 | 4.79E-57      | 4.87E-54  |
| STAM-AS1     | 102723166 | 248.018317  | 7.02E-56      | 6.85E-53  |
| LOC101927415 | 101927415 | 225.4079315 | 5.98E-51      | 5.23E-48  |
| LINC00441    | 100862704 | 225.1030522 | 6.97E-51      | 5.90E-48  |
| KMT2E-AS1    | 100216545 | 220.0493248 | 8.82E-50      | 6.99E-47  |
| LOC101928736 | 101928736 | 216.9251626 | 4.24E-49      | 3.26E-46  |
| C12orf61     | NA        | 215.9358295 | 6.96E-49      | 5.20E-46  |
| LOC100129917 | 100129917 | 215.2926096 | 9.62E-49      | 6.97E-46  |
| LOC101928068 | 101928068 | 213.9745001 | 1.87E-48      | 1.31E-45  |
| MAN1B1-AS1   | 100289341 | 213.3515087 | 2.55E-48      | 1.70E-45  |
| LOC101927814 | 101927814 | 211.4063793 | 6.78E-48      | 4.41E-45  |
| UBAC2-AS1    | 100289373 | 204.9958059 | 1.70E-46      | 1.08E-43  |
| LOC101927780 | 101927780 | 199.303543  | 2.96E-45      | 1.79E-42  |
| CAHM         | 100526820 | 198.5372863 | 4.36E-45      | 2.57E-42  |
| CPEB2-AS1    | 441009    | 197.8035866 | 6.30E-45      | 3.63E-42  |
| HCG25        | 414765    | 196.1184259 | 1.47E-44      | 8.28E-42  |
| FLJ38576     | 651430    | 195.3140965 | 2.20E-44      | 1.21E-41  |
| LOC54944     | NA        | 189.9619882 | 3.24E-43      | 1.68E-40  |
| BRWD1-IT2    | 103091865 | 188.2538811 | 7.65E-43      | 3.88E-40  |

**Supplementary Table S10: Characterized or predicted lincRNAs regulated by miR-34A in *TP53* wild-type cell lines**

| gene         | EGID      | am_cam_LR   | am_cam_PValue | am_cam_FDR |
|--------------|-----------|-------------|---------------|------------|
| LINC-PINT    | 378805    | 381.8643292 | 4.89E-85      | 1.24E-80   |
| LOC644656    | 644656    | 119.7353594 | 7.23E-28      | 6.11E-24   |
| LOC344887    | 344887    | 69.94253035 | 6.11E-17      | 2.21E-13   |
| LINC00936    | 338758    | 58.27640275 | 2.28E-14      | 3.21E-11   |
| SPACA6P-AS   | 102238594 | 56.07307338 | 6.98E-14      | 7.70E-11   |
| CPEB2-AS1    | 441009    | 55.53061977 | 9.20E-14      | 9.34E-11   |
| LOC400684    | 400684    | 55.53371428 | 9.19E-14      | 9.34E-11   |
| LOC101927814 | 101927814 | 51.32297876 | 7.84E-13      | 6.85E-10   |
| STAM-AS1     | 102723166 | 48.45045765 | 3.39E-12      | 2.63E-09   |
| HEXA-AS1     | 80072     | 48.2415082  | 3.77E-12      | 2.81E-09   |
| MIAT         | 440823    | 48.16623803 | 3.92E-12      | 2.84E-09   |



|              |           |             |          |          |
|--------------|-----------|-------------|----------|----------|
| NEAT1        | 283131    | 47.44178139 | 5.67E-12 | 3.99E-09 |
| C12orf61     | NA        | 47.14750687 | 6.58E-12 | 4.51E-09 |
| BCYRN1       | 618       | 46.40988005 | 9.59E-12 | 6.40E-09 |
| FRMD6-AS1    | 145438    | 46.3259134  | 1.00E-11 | 6.51E-09 |
| MGC45800     | 90768     | 45.09756814 | 1.87E-11 | 1.16E-08 |
| LOC101927415 | 101927415 | 44.73577041 | 2.25E-11 | 1.36E-08 |
| LINC00472    | 79940     | 44.54903341 | 2.48E-11 | 1.46E-08 |
| LOC284454    | 284454    | 44.45702603 | 2.60E-11 | 1.50E-08 |
| LOC100630918 | 100630918 | 42.49563696 | 7.08E-11 | 3.99E-08 |
| CTB-113P19.1 | 101927096 | 41.86646707 | 9.77E-11 | 5.15E-08 |
| LOC100129917 | 100129917 | 41.83264304 | 9.94E-11 | 5.15E-08 |

**Supplementary Table S11: De-repression of known miR-34A target transcripts following transfection with hsa-miR-34A-5p inhibitor in 3 LFS cell lines (FB01, FB04, FB05)**

| Gene ID | Log (fold change) | FDR (q)     |
|---------|-------------------|-------------|
| PPP1R10 | 1.727372614       | 8.45E-90    |
| PDGFRB  | 0.848608276       | 2.53E-11    |
| VEGFA   | 0.59431805        | 8.67E-09    |
| NAMPT   | 0.712469046       | 1.65E-08    |
| CDK6    | 0.508272026       | 5.27E-05    |
| MET     | 0.500283172       | 0.000296188 |
| GAS1    | 0.647907363       | 0.00067168  |
| AXL     | 0.449788043       | 0.000685509 |
| CCND1   | 0.474472527       | 0.00079473  |
| YY1     | 0.295662589       | 0.013352936 |
| CSF1R   | 0.828064395       | 0.035190892 |
| MYC     | 0.252651332       | 0.037723845 |

**Supplementary Data: Differential Expression Analysis.** See Supplementary Data
